# Supplementary material
Source: Springer Nature journal article supplement (https://www.springermedizin.de/resource/supplementary/12245_2011_58_MOESM4_ESM.pdf/9672686)

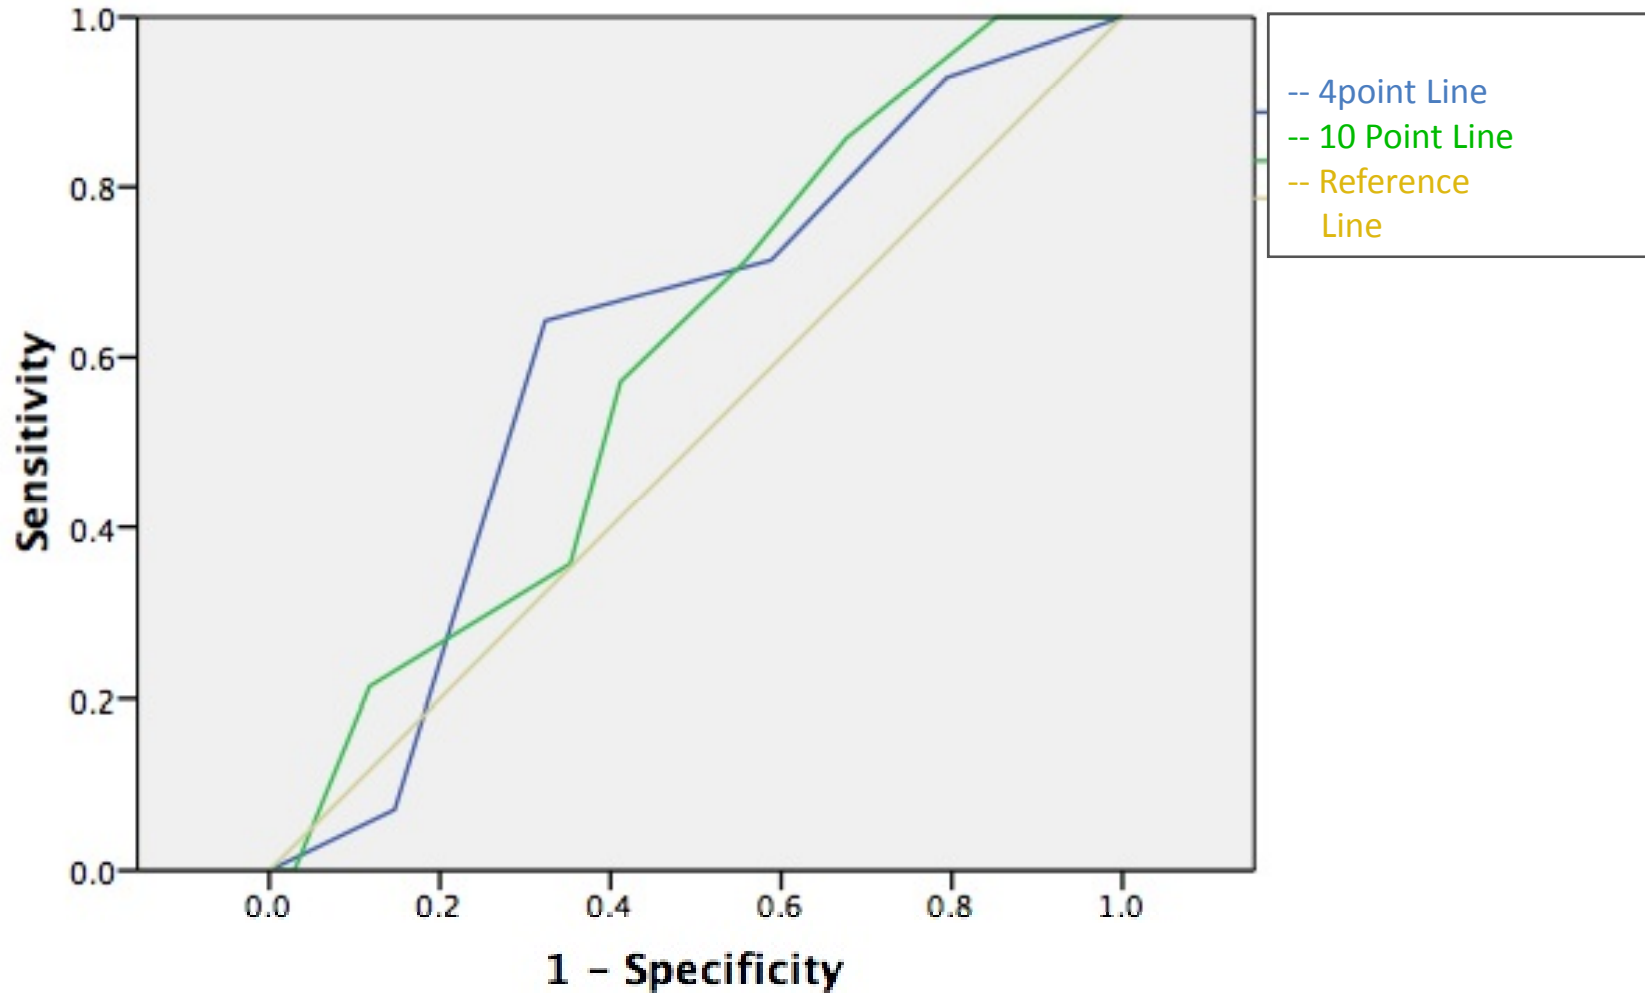

Supplement: MOESM4 [file 9672686]
